# Supplementary material for: Exploring Gender Differences within Forest Schools as a Physical Activity Intervention
Source: Children (Basel). 2018 Sep 26;5(10):138. doi: 10.3390/children5100138 (PMC6211073; doi:10.3390/children5100138)
Supplement: Supplementary file 1 [file children-05-00138-s001.pdf]

Appendix 1.

**LIVERPOOL JOHN MOORES UNIVERSITY  
PARENTAL CONSENT FORM**

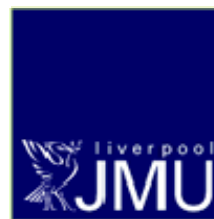

**Natural Health Service in the Mersey Forest: Forest Schools**

**Dr Zoe Knowles, Research Institute for Sport and Exercise Sciences**

Please tick/cross the relevant boxes below:

1. I confirm that I have read and understand the information provided for the above study. I have had the opportunity to consider the information, ask questions and have had these answered satisfactorily. 1
2. I understand that my child's participation in the research is voluntary and that I am free to withdraw him/her at any time, without giving a reason and that this will not affect my legal rights. 2
3. I understand that any personal information collected during the study will be anonymised and remain confidential. 3
4. I give permission for photographs to be taken of my child during the project, which may be used for subsequent academic/promotional purposes associated with The Mersey Forest. 4
5. I am aware that children will be weighed and measured and these results will remain confidential 5
6. I give permission for my child to wear an accelerometer to record their physical activity 6
7. I agree for my child to take part in the above study. 7

Name of Child \_\_\_\_\_

Name of Parent/Guardian: \_\_\_\_\_

Signature: \_\_\_\_\_ Date: \_\_\_\_\_

Name of Researcher \_\_\_\_\_ Date \_\_\_\_\_ Signature \_\_\_\_\_

Name of Person taking consent \_\_\_\_\_ Date \_\_\_\_\_ Signature \_\_\_\_\_  
(if different from researcher)

NOTE: When completed 1 copy for participant and 1 copy for researcher

### Parent/Guardian Contact Sheet

**Please only complete this section if you are interested in receiving further information, receiving information about research findings and about participating in future activities The Mersey Forest has to offer.**

Name of Parent/Guardian: \_\_\_\_\_

Name of Child: \_\_\_\_\_

Address:

---

---

---

---

Contact telephone number: \_\_\_\_\_

E-mail address (if applicable): \_\_\_\_\_

Please state what your preferred method of contact is: \_\_\_\_\_

Note: The details provided here **will not be shared with any organisations outside the study**. The information will be used to inform you of family activities, research findings in this project and to send out involvement vouchers.

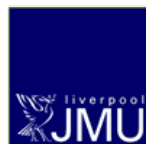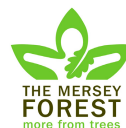

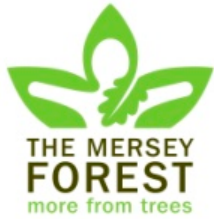

**LIVERPOOL JOHN MOORES UNIVERSITY  
ASSENT FORM FOR CHILDREN / OTHER  
DEPENDENTS**  
(to be completed by the child and their parent/guardian)

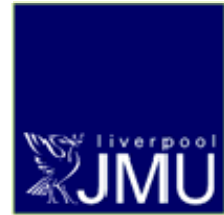

**Natural Health Service in the Mersey Forest: Forest Schools**

**Dr Zoe Knowles, Research Institute for Sport and Exercise Sciences**

*Child (or if unable, parent/guardian on their behalf) / young person  
to circle all they agree with:*

1. Have you read (or had read to you) information about this project? Yes/No
2. Has somebody else explained this project to you? Yes/No
3. Do you understand what this project is about? Yes/No
4. Have you asked all the questions you want? Yes/No
5. Have you had your questions answered in a way you understand? Yes/No
6. Do you understand it's OK to stop taking part at any time? Yes/No
7. Are you happy to take part? Yes/No

If any answers are 'no' or you **don't** want to take part, don't sign your name!

If you **do** want to take part, you can write your name below

Your name \_\_\_\_\_

Date \_\_\_\_\_

Your parent or guardian must write their name here if they are happy for you to do the project.

Print Name \_\_\_\_\_

Sign \_\_\_\_\_

Date \_\_\_\_\_

The researcher who explained this project to you needs to sign too.

Print Name \_\_\_\_\_
